# Supplementary material for: Polyphenol Extract from Evening Primrose (Oenothera paradoxa) Inhibits Invasion Properties of Human Malignant Pleural Mesothelioma Cells
Source: MDPI journal article supplement (doi:10.3390/biom10111574), 2020-11-19

**Figure 3S. LC-TOF-MS 5600+ spectra of the selected compounds of *O. paradoxa* extract.** Phenolic profile of EP extract performed by LC-TripleTOF-MS in positive (A) and negative (B) ionization modes. 1. caffeic acid, 2. catechin, 3. epicatechin gallate, 4. quercetin, 5. ellagic acid, 6. procyanidin B2, 7. gallic acid, 8. PGG

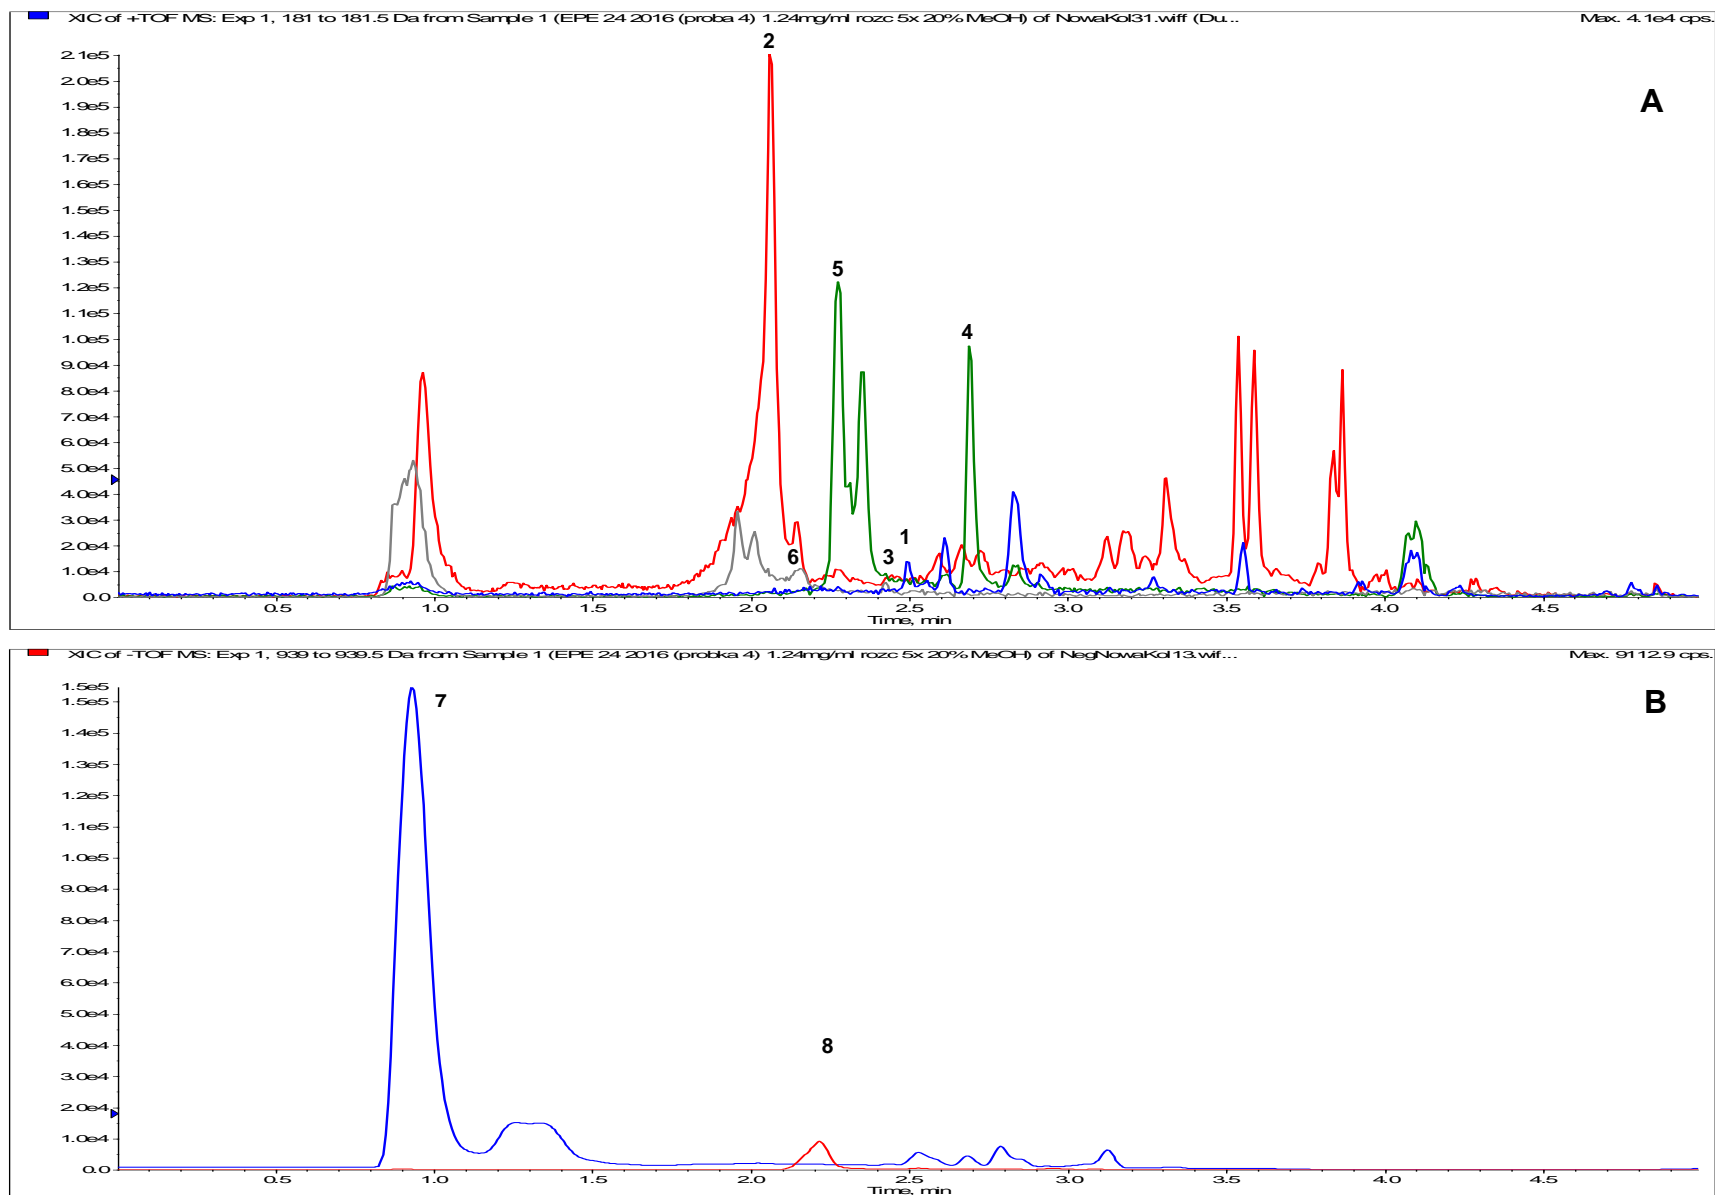

Supplement: s1 [file s1]
